# Supplementary material
Source: MDPI journal article supplement (https://www.mdpi.com/2079-9284/4/4/42)
Supplement: s1 [file s1]

Article

Instrumental Evaluation of the Depigmenting Efficacy of an Oral Supplementation Containing Peptides and Chrysanthemum Extract for the Treatment of Melasma

Min Gui 1,†, Juntao Kan 1,†, Di Qu 2, Yinbei Chen 1, Rong Luo 3, Yumin Liu 1 and Jun Du 1, *

1 Nutrilite Health Institute, 720 Cailun Road, Shanghai 201203, China; glemine@hotmail.com (M.G.); junot.kan@Amway.com (J.K.); Yinbei.Chen@Amway.com (Y.C.); Yumin.Liu@Amway.com (Y.L.)

2 Nutrilite Health Institute, 7575 Fulton Street East, Ada 49355, MI, USA; Di_Qu@Amway.com (D.Q.)

3 Nutrilite Health Institute, 58 floor, Citic Plaza, 233 Tianhe Northern Road, Guangzhou 510613, China; Rose_Luo@Amway.com (R.L.)

***** Correspondence: eric.du@Amway.com; Tel.: +86-21-23056956

† These authors contributed equally to this work.

Supplementary

|  | **0 day** | **60 days** |
| --- | --- | --- |
| Placebo | 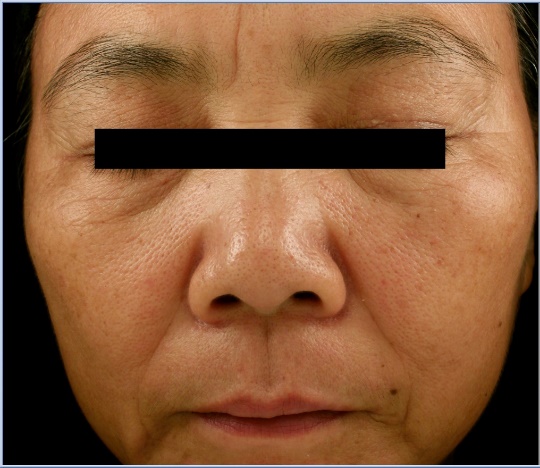 | 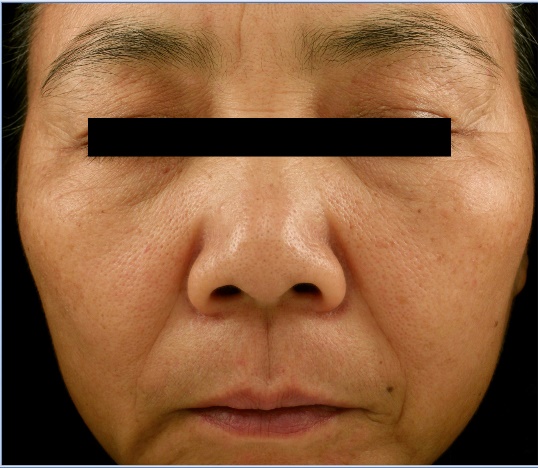 |
| Treatment | 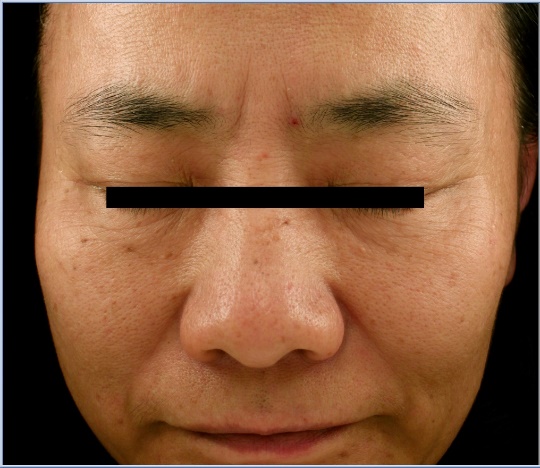 | 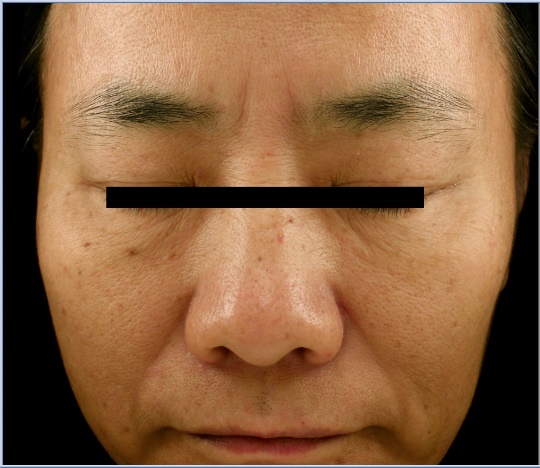 |

Figure S1. Before- and after- clinical photographs of two subjects.
